# Supplementary material for: Photodegradation of Biohazardous Dye Brilliant Blue R Using Organometallic Silver Nanoparticles Synthesized through a Green Chemistry Method
Source: MDPI journal article supplement (doi:10.3390/biology10080784), 2021-08-17
Supplement: s1 [file s1]

## Supplementary Data

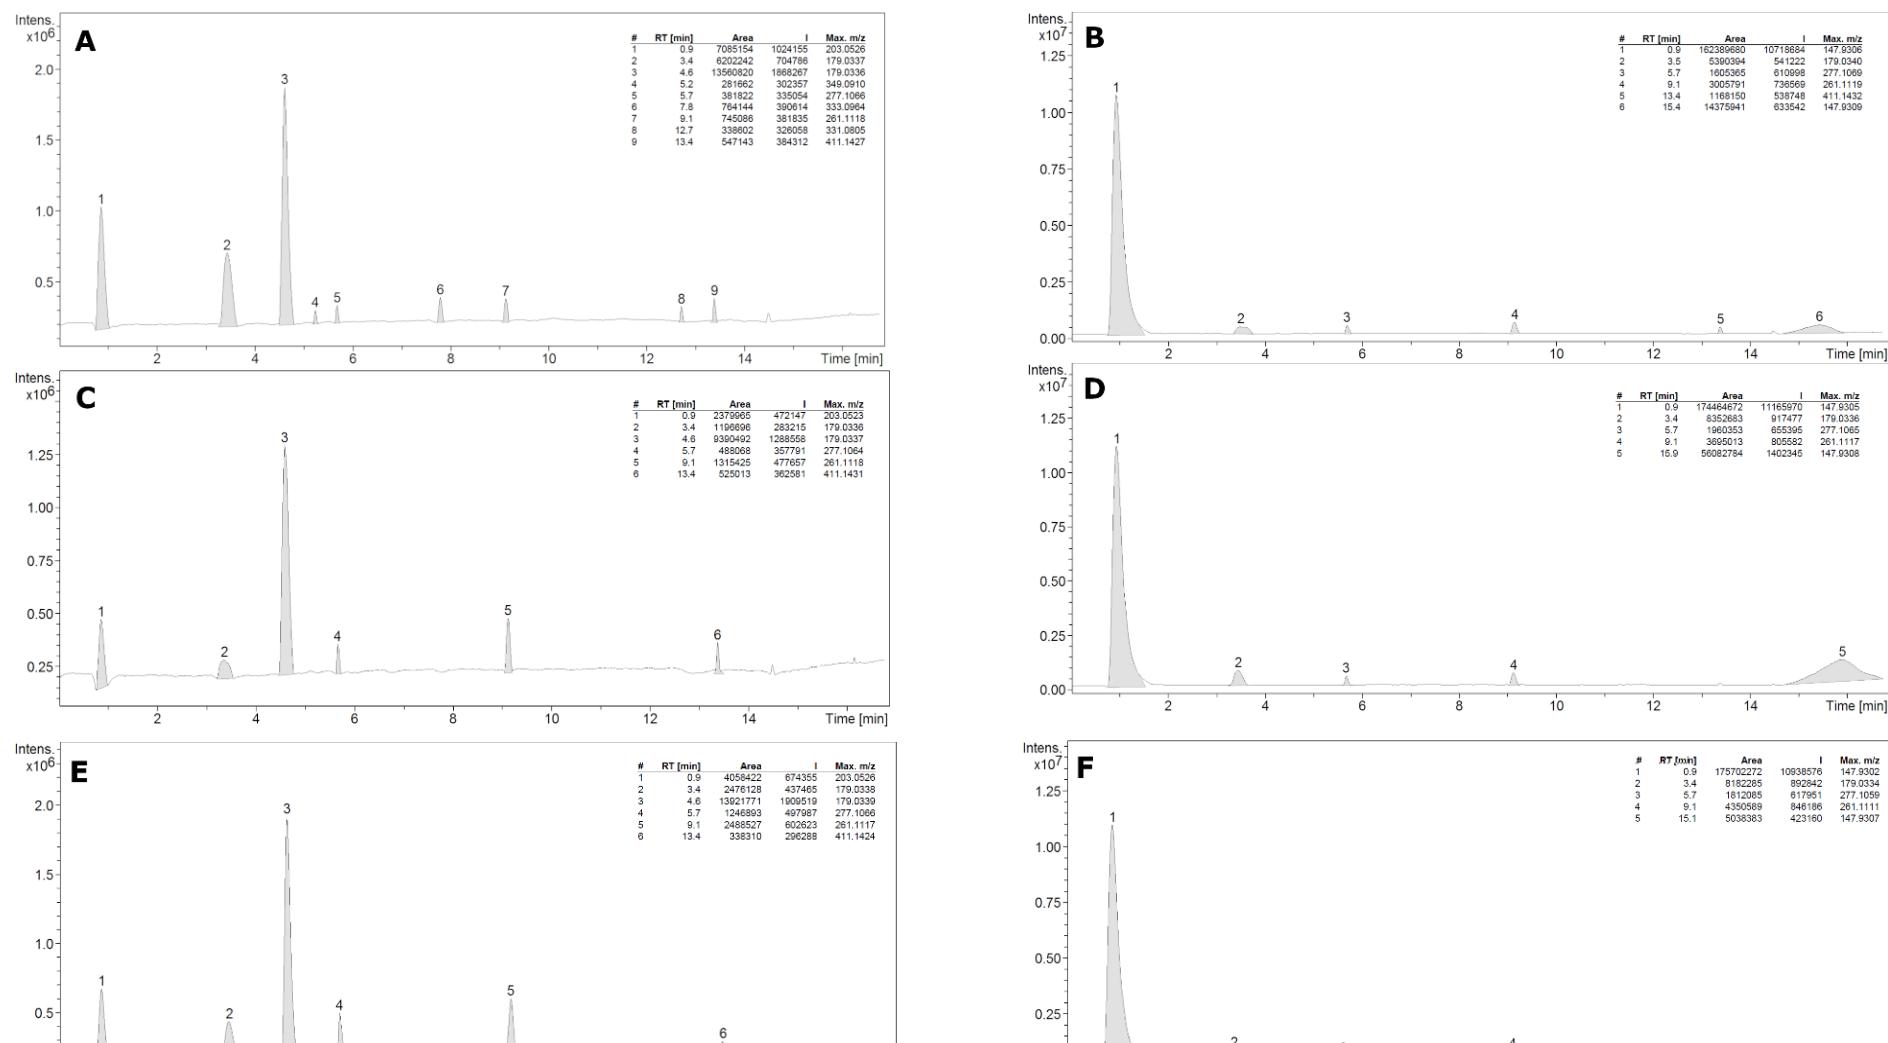

**Figure S1:** Chromatograms obtained for A-OMAg-Ns before (A) and after (B) synthesis, M-OMAgNs before (C) and after (D) synthesis, MH-OMAgNs before (E) and after (F) synthesis.

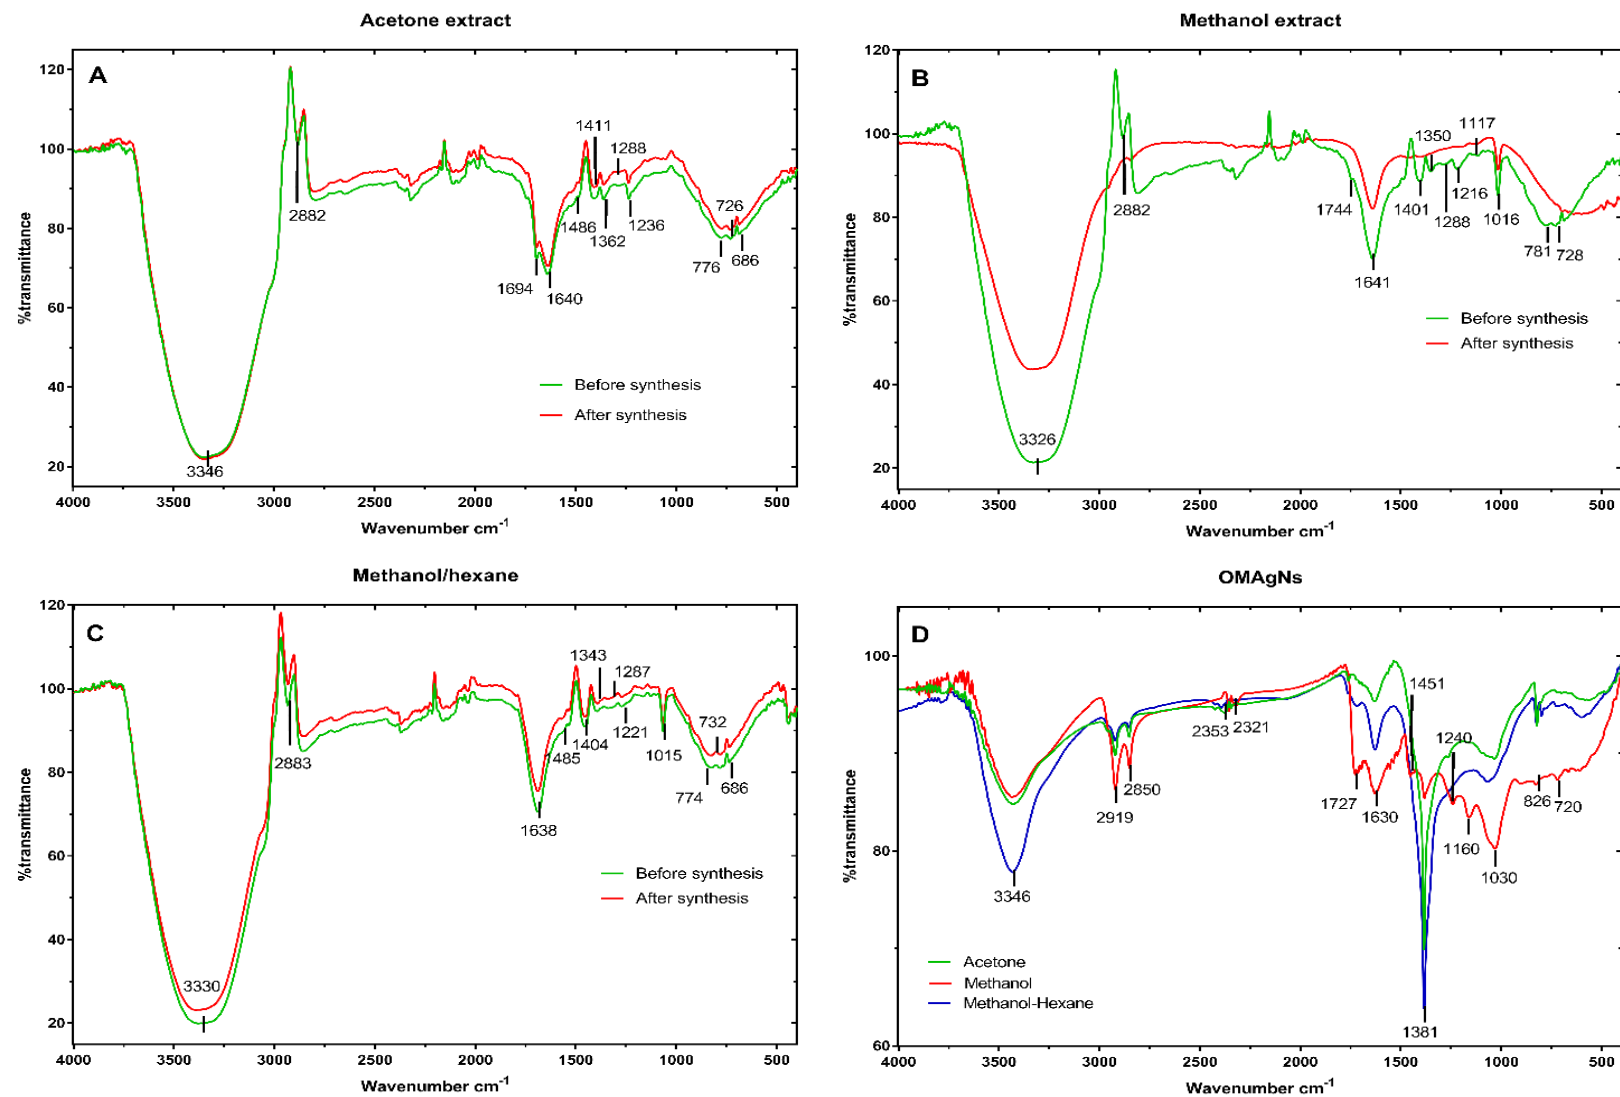

Figure S2: FTIR spectra before and after synthesis of: acetone (A), methanol (B), methanol-hexane (C) and synthesized OMAgNs (D)

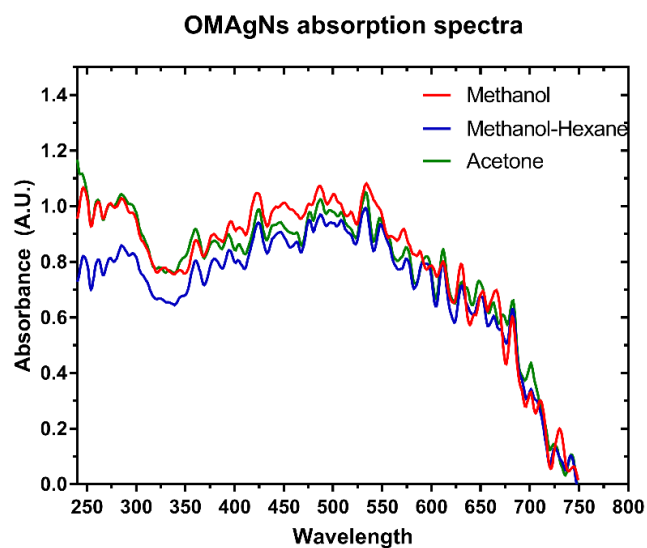

**Figure S3:** Absorption spectra of synthesized OMAgNs

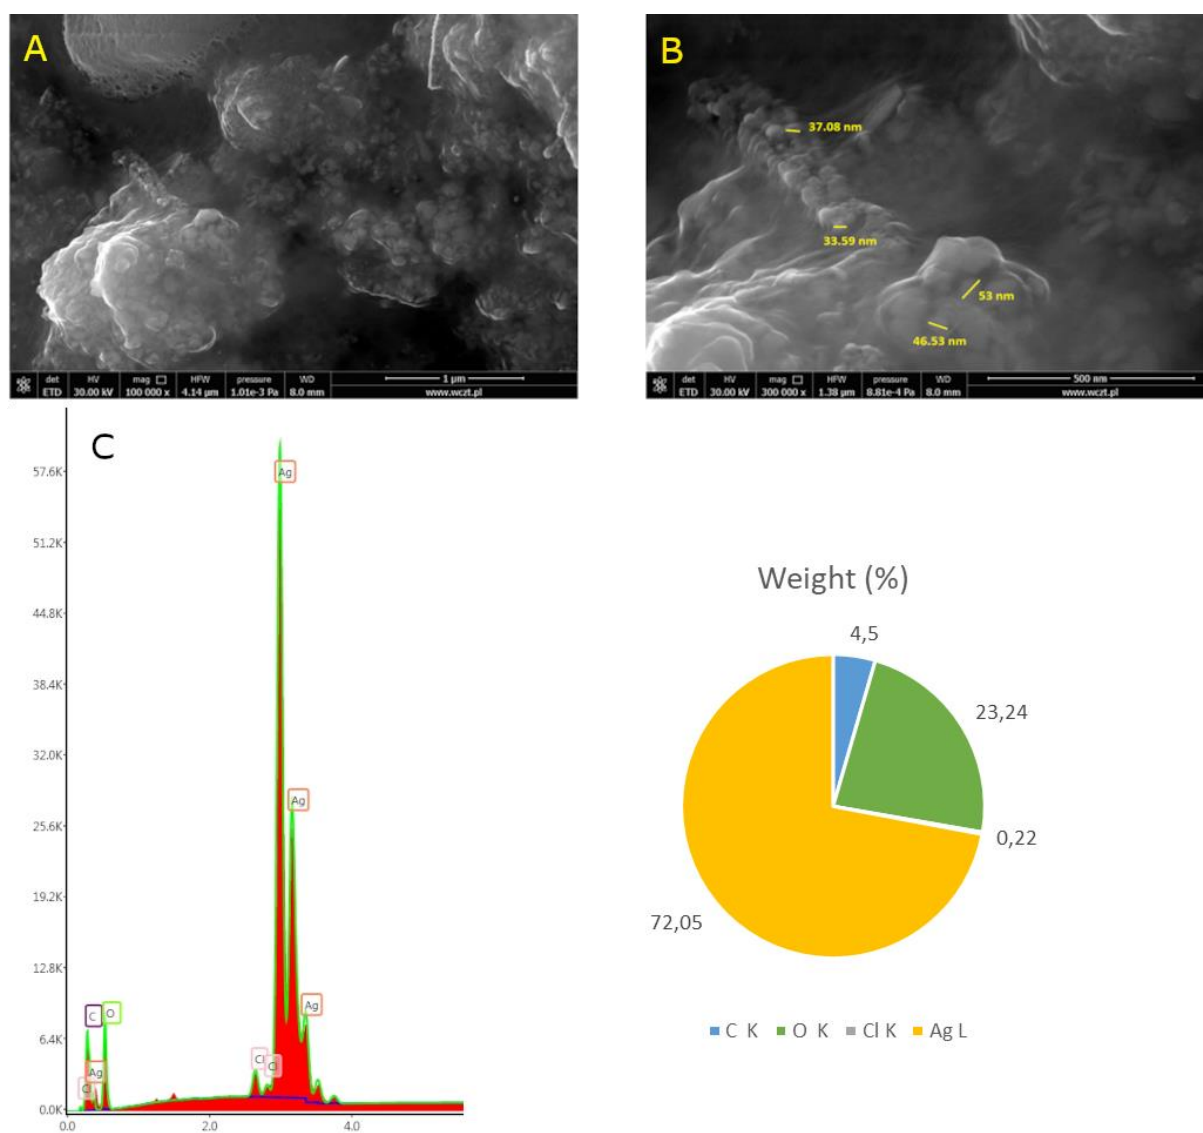

**Figure S4:** SEM images at 100000x (A), 300000x (B) magnification and EDX (C) analysis of A-OMAgNs

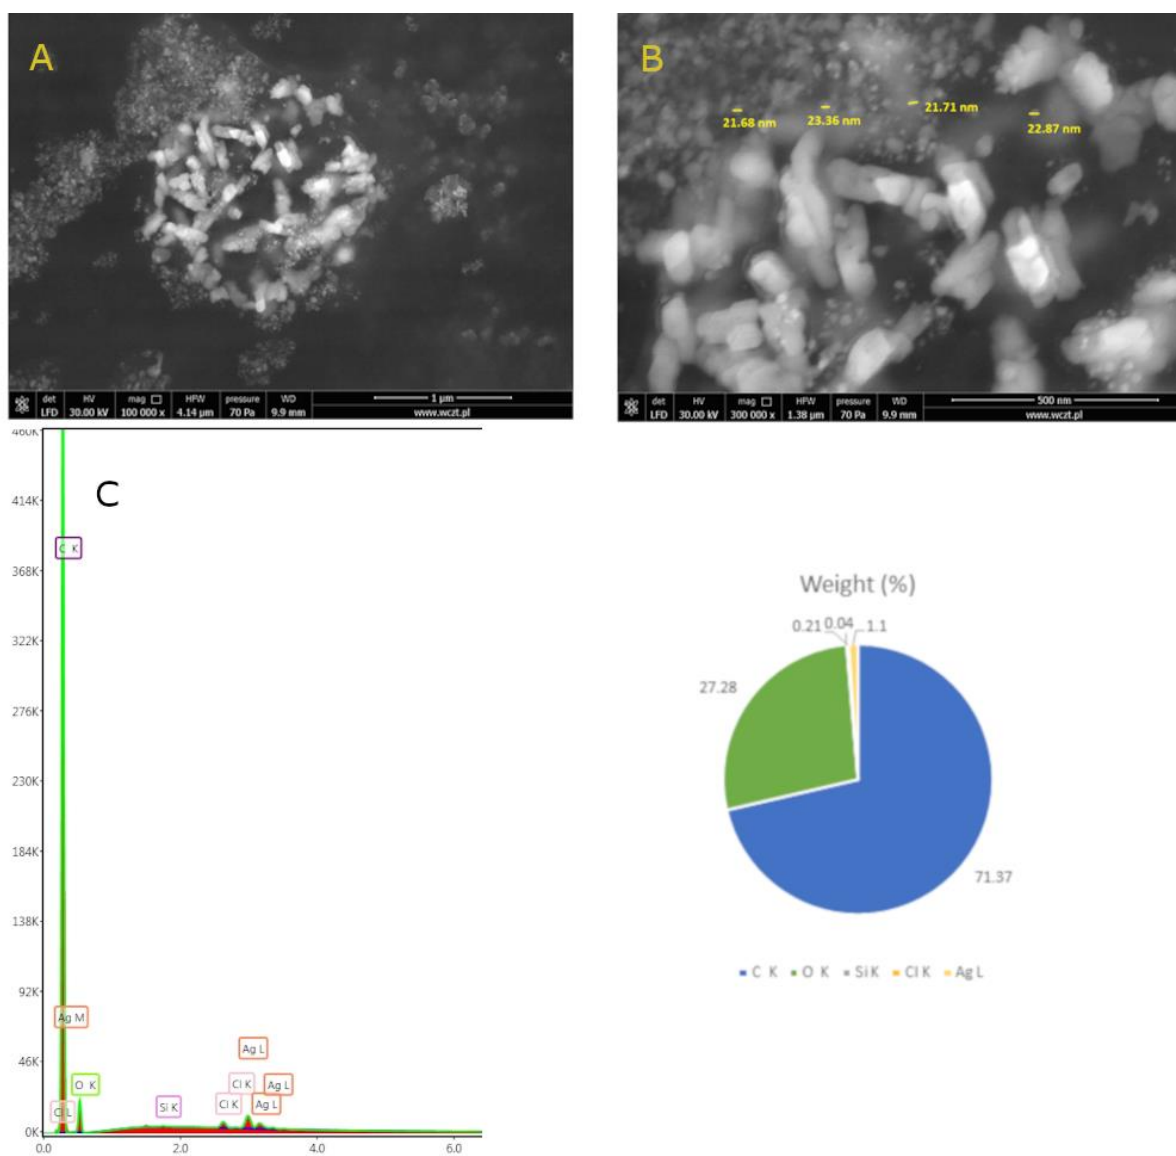

**Figure S5:** SEM images at 100000x (A), 300000x (B) magnification and EDX (C) analysis of M-OMAgNs

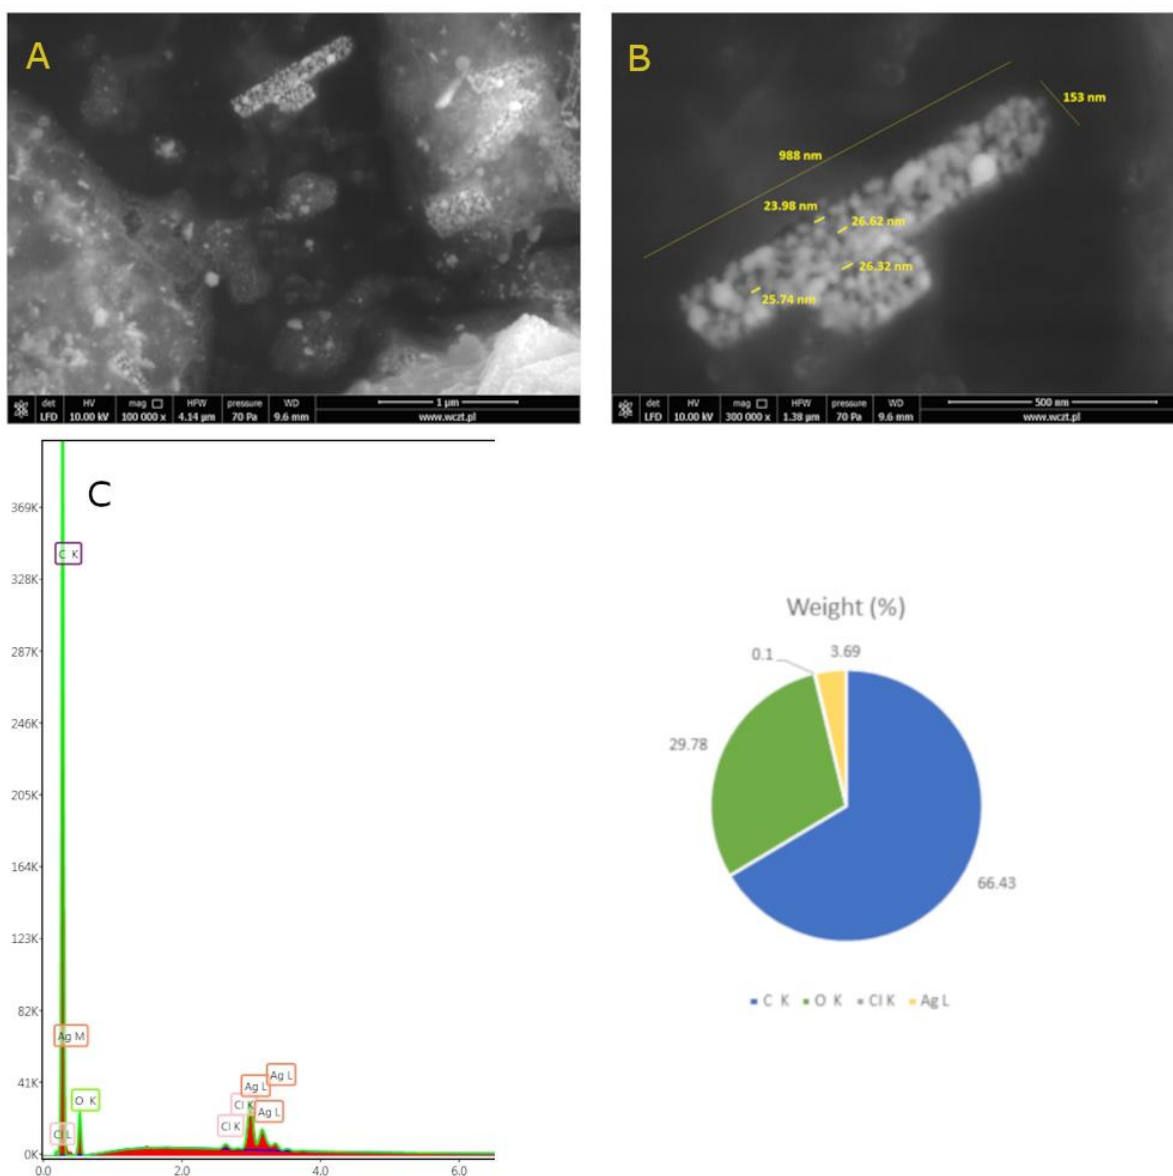

**Figure S6:** SEM images at 100000x (A), 300000x (B) and EDX (C) analysis of MH-OMAgNs

• **Table S1:** Absorbance values for first, second and third round of M-OMAgNs and extract (shown as a.u.)

|                  | Time (min) | 220 nm | 261 nm | 309 nm | 555 nm |
|------------------|------------|--------|--------|--------|--------|
| <b>1st round</b> | 0          | 4.062  | 1.551  | 1.582  | 5.093  |
|                  | 5          | 2.019  | 0.852  | 0.797  | 2.109  |
|                  | 10         | 1.638  | 0.736  | 0.601  | 1.497  |
|                  | 15         | 1.559  | 0.702  | 0.554  | 1.377  |

|                  |    |       |       |       |       |
|------------------|----|-------|-------|-------|-------|
|                  | 20 | 1.644 | 0.746 | 0.576 | 1.365 |
|                  | 30 | 1.300 | 0.552 | 0.409 | 0.961 |
| <b>2nd round</b> | 0  | 3.449 | 1.309 | 1.290 | 3.955 |
|                  | 5  | 2.052 | 0.797 | 0.745 | 2.160 |
|                  | 10 | 1.892 | 0.774 | 0.716 | 1.955 |
|                  | 15 | 2.036 | 0.856 | 0.804 | 2.140 |
|                  | 20 | 1.896 | 0.791 | 0.750 | 2.012 |
|                  | 30 | 2.019 | 0.852 | 0.797 | 2.109 |
| <b>3rd round</b> | 0  | 3.449 | 1.309 | 1.290 | 3.955 |
|                  | 5  | 2.400 | 0.982 | 0.946 | 2.546 |
|                  | 10 | 2.326 | 0.966 | 0.939 | 2.551 |
|                  | 15 | 2.236 | 0.926 | 0.896 | 2.446 |
|                  | 20 | 2.174 | 0.901 | 0.874 | 2.450 |
|                  | 30 | 2.104 | 0.870 | 0.825 | 2.319 |
| <b>Extract</b>   | 0  | 3.449 | 1.309 | 1.290 | 3.955 |
|                  | 5  | 7.753 | 3.490 | 3.203 | 1.869 |
|                  | 10 | 7.987 | 3.553 | 3.258 | 1.851 |
|                  | 15 | 7.814 | 3.527 | 3.210 | 1.777 |
|                  | 20 | 7.703 | 3.498 | 3.156 | 1.727 |
|                  | 30 | 7.659 | 3.477 | 3.140 | 1.654 |
